# Supplementary material for: A red-emitting cationic hyperbranched polymer: facile synthesis, aggregation-enhanced emission, large Stokes shift, polarity-insensitive fluorescence and application in cell imaging
Source: Royal Society of Chemistry journal article supplement (doi:10.1039/c7py01378g), 2017-01-01
Supplement: c7py01378g1.pdf [file c7py01378g1.pdf]

*Electronic Supporting Information for:*

**A red-emitting cationic hyperbranched polymer: Facile synthesis, aggregation-enhanced emission, large Stokes shift, polarity-insensitive fluorescence and application in cell imaging**

Rui Chen,<sup>a</sup> Xiaoying Gao,<sup>a</sup> Xiao Cheng,<sup>a</sup> Anjun Qin<sup>ab</sup>, Jing Zhi Sun<sup>a,\*</sup>, and Ben Zhong Tang<sup>abc,\*</sup>

*<sup>a</sup>MoE Key Laboratory of Macromolecule Synthesis and Functionalization, Department of Polymer Science and Engineering, Zhejiang University, Hangzhou 310027, China.*

*E-mail: sunjz@zju.edu.cn; Fax: +86 571 87953734; Tel: +86 571 87953734*

*<sup>b</sup> Guangdong Innovative Research Team, State Key Laboratory of Luminescent Materials and Devices, South China University of Technology, Guangzhou 510640, China.*

*<sup>c</sup> Department of Chemistry, Hong Kong Branch of Chinese National Engineering Research Center for Tissue Restoration and Reconstruction, The Hong Kong University of Science and Technology, Clear Water Bay, Kowloon, Hong Kong, China.*

*E-mail: tangbenz@ust.hk; Fax: +852-23581594; Tel: +852-23587375*

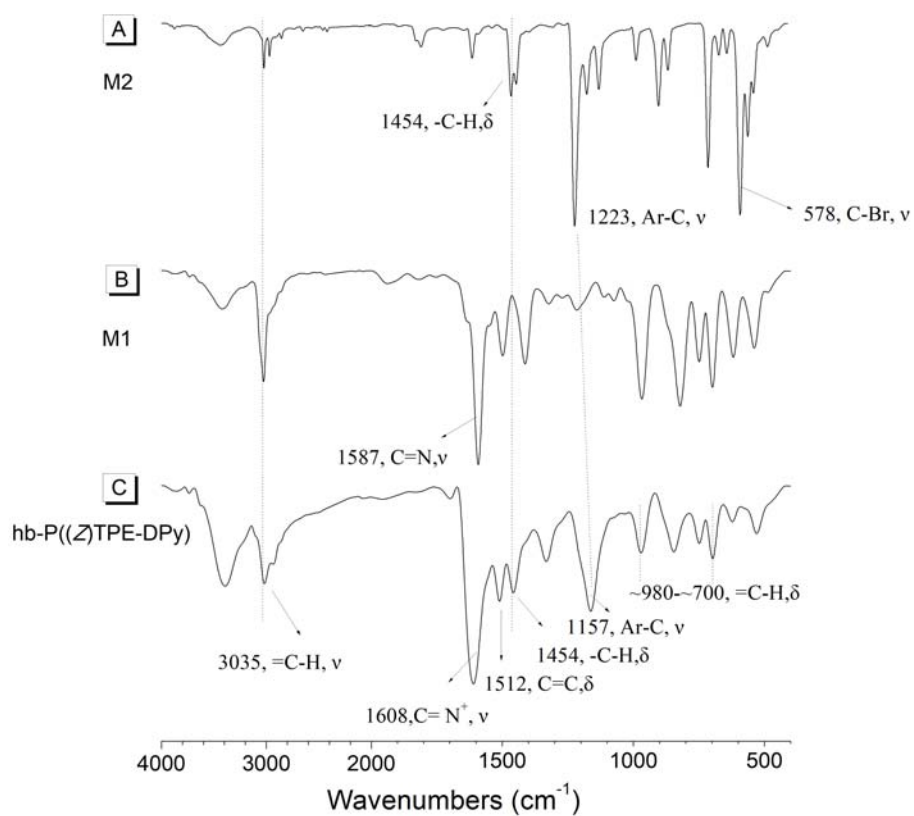

**Figure S1.** FTIR spectra of 1,3,5-tribromomethylbenzene (M2) (A), (Z)-TPE-DPy (M1) (B), and *hb-P*((Z)TPE-DPy) (C) measured in KBr pellets.

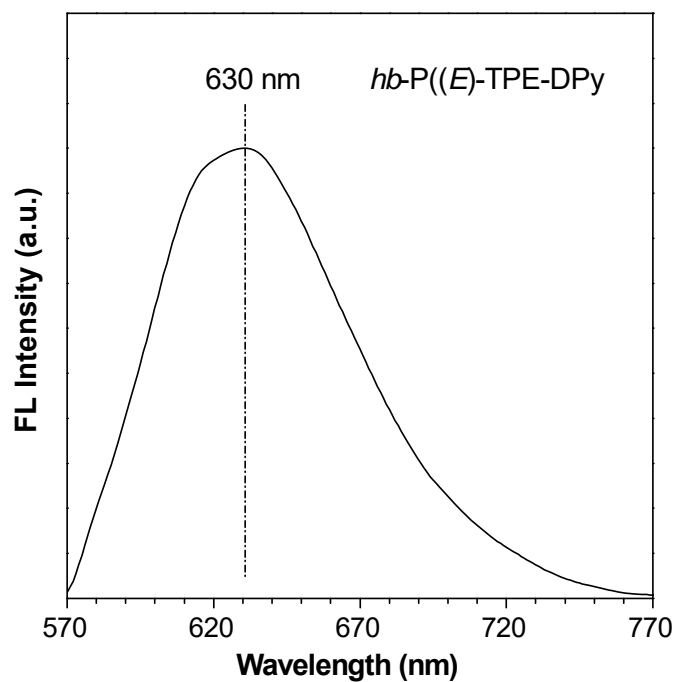

**Figure S2.** Fluorescence (FL) spectra of solid sample of *hb-P*((E)TPE-DPy), excitation wavelength: 550 nm.

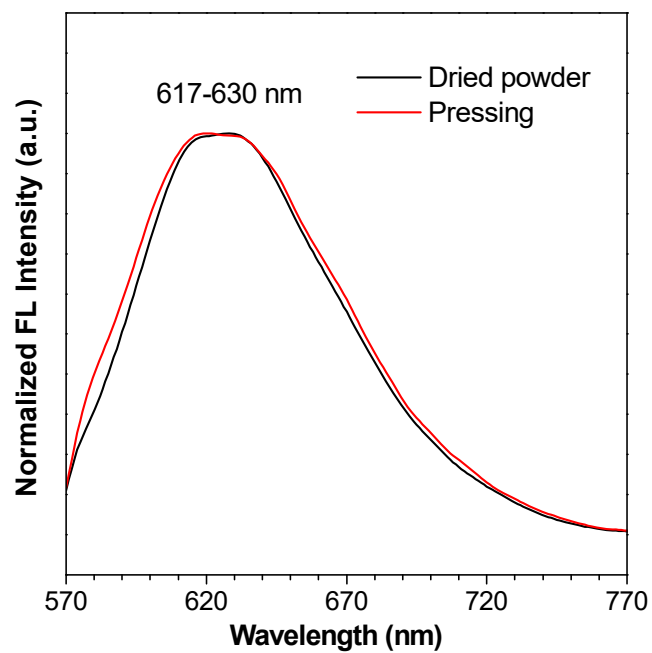

**Figure S3.** Fluorescence (FL) spectra of solid sample of *hb*-P((*Z*)TPE-DPy) before and after pressing treatment, excitation wavelength: 550 nm.

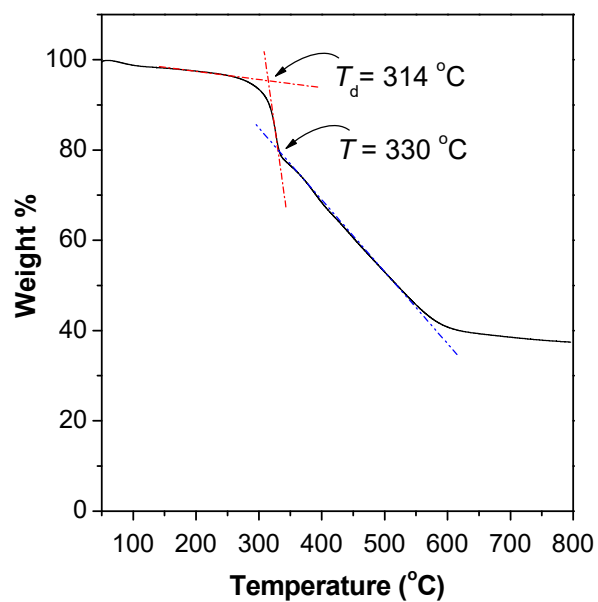

**Figure S4.** Thermogravimetric analysis of *hb*-P((*Z*)TPE-DPy) under N<sub>2</sub> environment (Heating rate: 10 °C/min).
